# Supplementary material for: High solid-state luminescence in propeller-shaped AIE-active pyridine–ketoiminate–boron complexes
Source: Royal Society of Chemistry journal article supplement (doi:10.1039/c5ob00607d), 2015-01-01
Supplement: c5ob00607d1.pdf [file c5ob00607d1.pdf]

## Supporting Information

for

### High Solid-State Luminescence in Propeller-Shaped AIE-active Pyridine-Ketoiminate-Boron Complexes

Yanping Wu,<sup>a,†</sup> Zhenyu Li,<sup>a,†</sup> Qingsong Liu,<sup>a</sup> Xiaoqing Wang,<sup>\*,a,c</sup> Hui Yan,<sup>d</sup> Shuwen Gong,<sup>a</sup> Zhipeng Liu,<sup>\*,a</sup> and Weijiang He<sup>\*,b</sup>

<sup>a</sup> Institute of Functional Organic Molecules and Materials, School of Chemistry and Chemical Engineering, Liaocheng University, No.1 Hunan Road, Liaocheng, 252000, People's Republic of China; E-mail: [chliuzp@163.com](mailto:chliuzp@163.com); wangxiaoqing@lcu.edu.cn.

<sup>b</sup> State Key Laboratory of Coordination Chemistry, Coordination Chemistry Institute, School of Chemistry and Chemical Engineering, Nanjing University, Nanjing, P.R. China, 210093. E-mail: hewej69@nju.edu.cn.

<sup>c</sup> School of Material Science and Engineering, Liaocheng University, No.1 Hunan Road, Liaocheng, 252000, People's Republic of China;

<sup>d</sup> School of Pharmacy, Liaocheng University, No.1 Hunan Road, Liaocheng, 252000, People's Republic of China.

† Both authors contribute equally to this work.

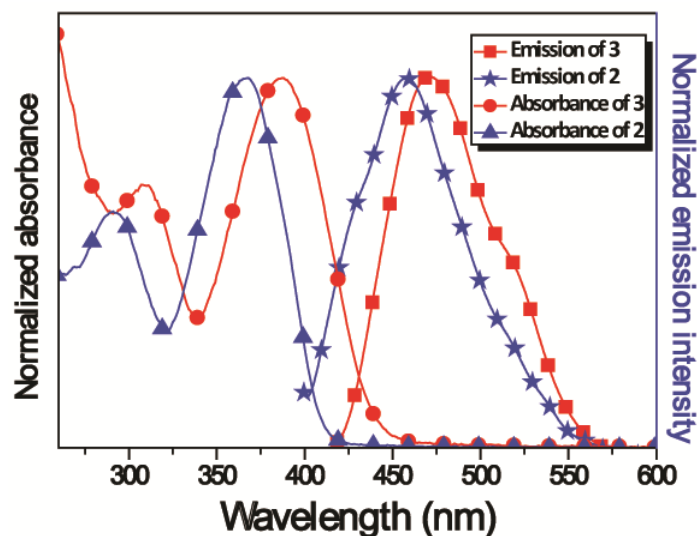

Figure S1. Absorption and emission spectra of **2** and **3** in dichloromethane (50  $\mu$ M).

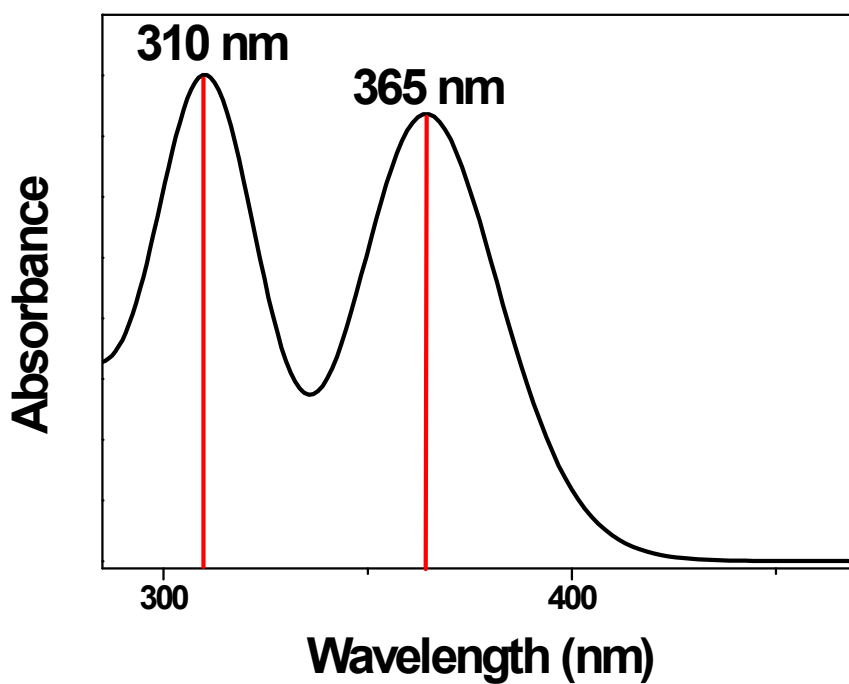

Figure S2. Calculated absorption spectra of 2.

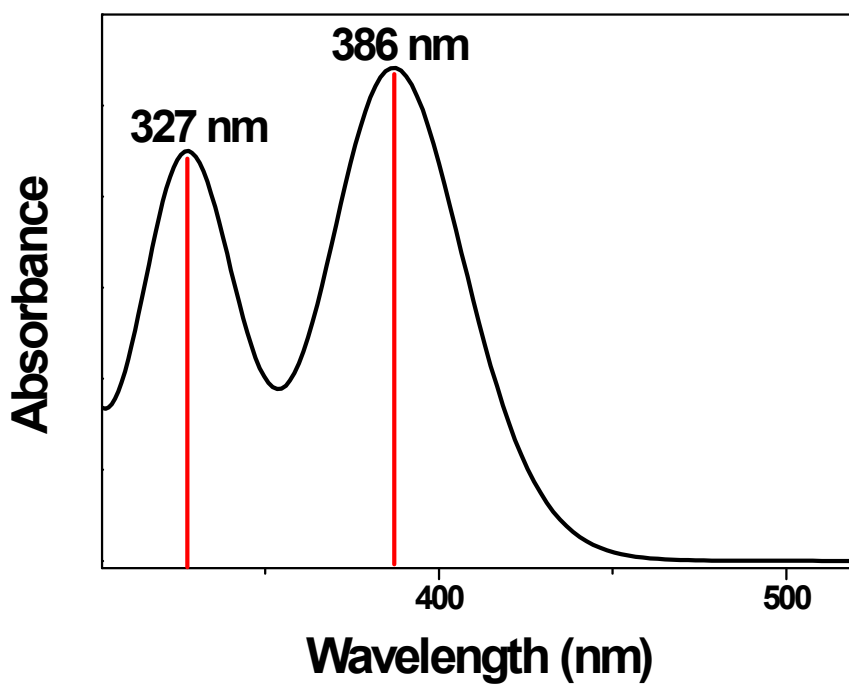

Figure S3. Calculated absorption spectra of 3.

**Table S1.** Crystal data and structure refinement for **2**.

---

|                                   |                                                                                                             |
|-----------------------------------|-------------------------------------------------------------------------------------------------------------|
| Identification code               | <b>2</b>                                                                                                    |
| Empirical formula                 | C <sub>19</sub> H <sub>14</sub> BF <sub>2</sub> NO                                                          |
| Formula weight                    | 321.12                                                                                                      |
| Temperature                       | 298(2) K                                                                                                    |
| Wavelength                        | 0.71073 Å                                                                                                   |
| Crystal system, space group       | Monoclinic, P2(1)/n                                                                                         |
| Unit cell dimensions              | a = 10.2403(9) Å $\alpha$ = 90°<br>b = 12.1323(11) Å $\beta$ = 92.5160°<br>c = 12.4975(12) Å $\gamma$ = 90° |
| Volume                            | 1551.2(2) Å <sup>3</sup>                                                                                    |
| Z, Calculated density             | 4, 1.375 Mg/m <sup>3</sup>                                                                                  |
| Absorption coefficient            | 0.100 mm <sup>-1</sup>                                                                                      |
| F(000)                            | 664                                                                                                         |
| Crystal size                      | 0.45 x 0.43 x 0.42 mm <sup>3</sup>                                                                          |
| Theta range for data collection   | 2.34 to 25.02°                                                                                              |
| Limiting indices                  | -10 ≤ h ≤ 12, -9 ≤ k ≤ 14, -13 ≤ l ≤ 14                                                                     |
| Reflections collected / unique    | 7566 / 2735 [R(int) = 0.0456]                                                                               |
| Completeness to theta = 25.02     | 99.8 %                                                                                                      |
| Absorption correction             | None                                                                                                        |
| Max. and min. transmission        | 0.9857 and 0.9690                                                                                           |
| Refinement method                 | Full-matrix least-squares on F <sup>2</sup>                                                                 |
| Data / restraints / parameters    | 2735 / 0 / 218                                                                                              |
| Goodness-of-fit on F <sup>2</sup> | 0.960                                                                                                       |
| Final R indices [I > 2σ(I)]       | R1 = 0.0379, wR2 = 0.0920                                                                                   |
| R indices (all data)              | R1 = 0.0739, wR2 = 0.1122                                                                                   |
| Extinction coefficient            | 0.061(4)                                                                                                    |
| Largest diff. peak and hole       | 0.134 and -0.155 e.Å <sup>-3</sup>                                                                          |

---

**Table S2.** Crystal data and structure refinement for **3**.

---

|                                   |                                                                                                                             |
|-----------------------------------|-----------------------------------------------------------------------------------------------------------------------------|
| Identification code               | <b>3</b>                                                                                                                    |
| Empirical formula                 | C <sub>31</sub> H <sub>24</sub> BNO                                                                                         |
| Formula weight                    | 437.32                                                                                                                      |
| Temperature                       | 298(2) K                                                                                                                    |
| Wavelength                        | 0.71073 Å                                                                                                                   |
| Crystal system, space group       | Triclinic, P-1                                                                                                              |
| Unit cell dimensions              | a = 9.2542(8)Å $\alpha$ = 109.354(2)°<br>b = 9.8875(9)Å $\beta$ = 102.8820(10)°<br>c = 14.4448(13)Å $\gamma$ = 95.3860(10)° |
| Volume                            | 1195.24(18)Å <sup>3</sup>                                                                                                   |
| Z, Calculated density             | 2, 1.215 Mg/m <sup>3</sup>                                                                                                  |
| Absorption coefficient            | 0.072 mm <sup>-1</sup>                                                                                                      |
| F(000)                            | 460                                                                                                                         |
| Crystal size                      | 0.44 x 0.37 x 0.20 mm <sup>3</sup>                                                                                          |
| Theta range for data collection   | 2.89 to 25.02°                                                                                                              |
| Limiting indices                  | -10 ≤ h ≤ 10, -11 ≤ k ≤ 11, -14 ≤ l ≤ 17                                                                                    |
| Reflections collected / unique    | 5993 / 4122 [R(int) = 0.0271]                                                                                               |
| Completeness to theta = 25.02     | 98.0 %                                                                                                                      |
| Absorption correction             | Semi-empirical from equivalents                                                                                             |
| Max. and min. transmission        | 0.9857 and 0.9690                                                                                                           |
| Refinement method                 | Full-matrix least-squares on F <sup>2</sup>                                                                                 |
| Data / restraints / parameters    | 4122 / 0 / 307                                                                                                              |
| Goodness-of-fit on F <sup>2</sup> | 0.697                                                                                                                       |
| Final R indices [I > 2σ(I)]       | R1 = 0.0511, wR2 = 0.1568                                                                                                   |
| R indices (all data)              | R1 = 0.1048, wR2 = 0.2173                                                                                                   |
| Largest diff. peak and hole       | 0.206 and -0.192 e.Å <sup>-3</sup>                                                                                          |

---

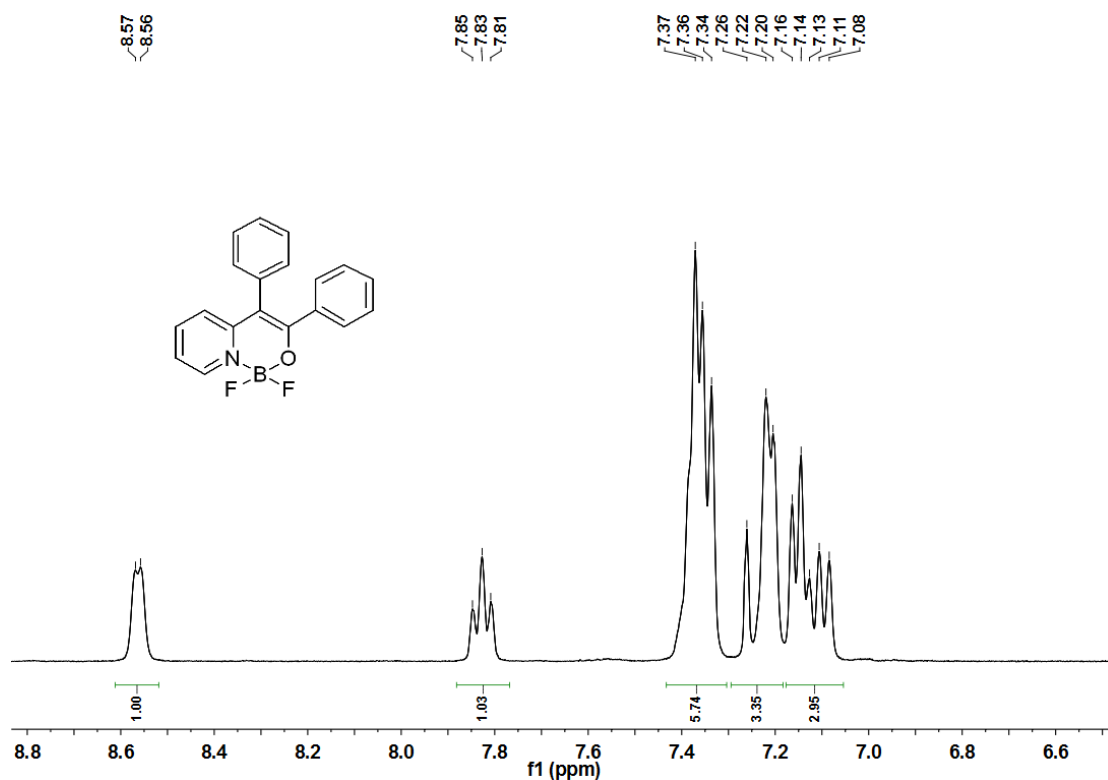

Figure S4. <sup>1</sup>H NMR spectrum of 2 in CDCl<sub>3</sub>.

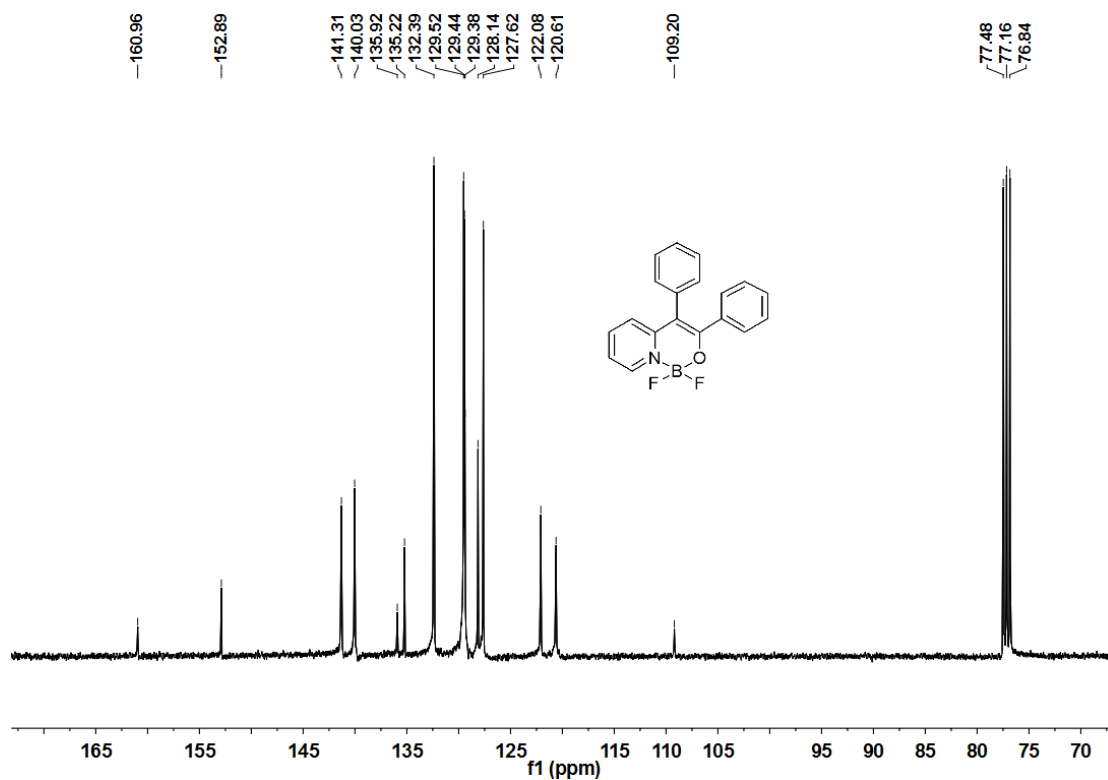

Figure S5. <sup>13</sup>C NMR spectrum of 2 in CDCl<sub>3</sub>.

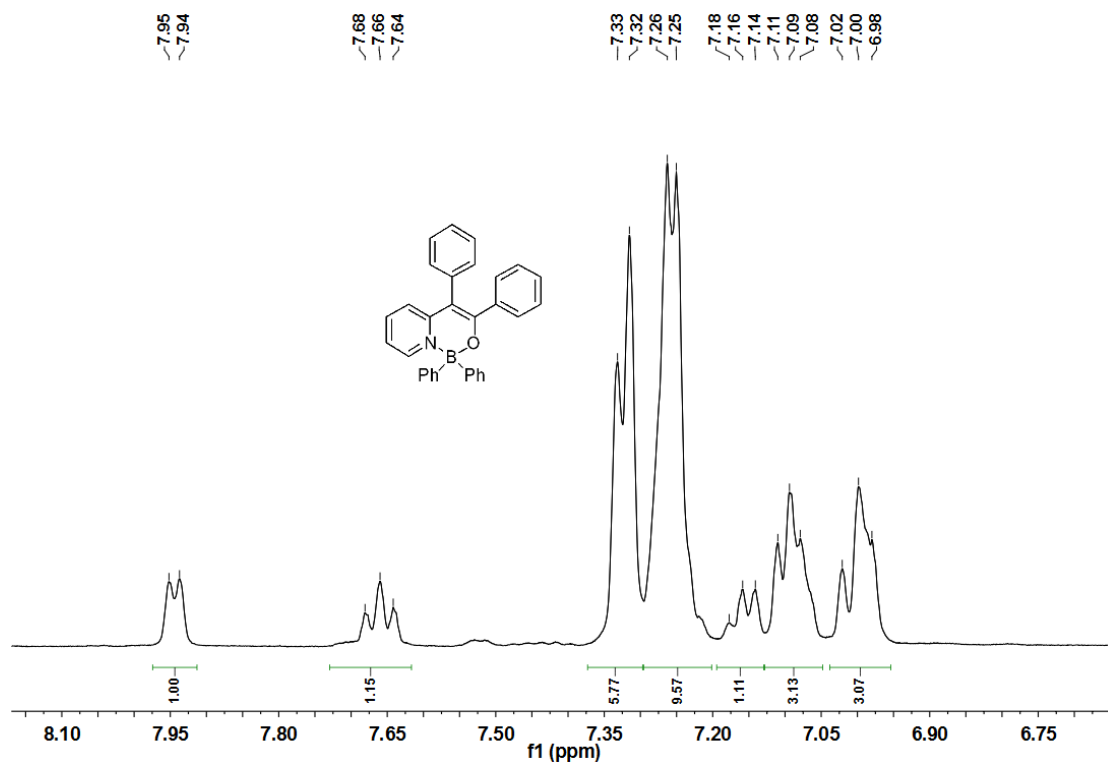

**Figure S6.** <sup>1</sup>H NMR spectrum of **3** in CDCl<sub>3</sub>.

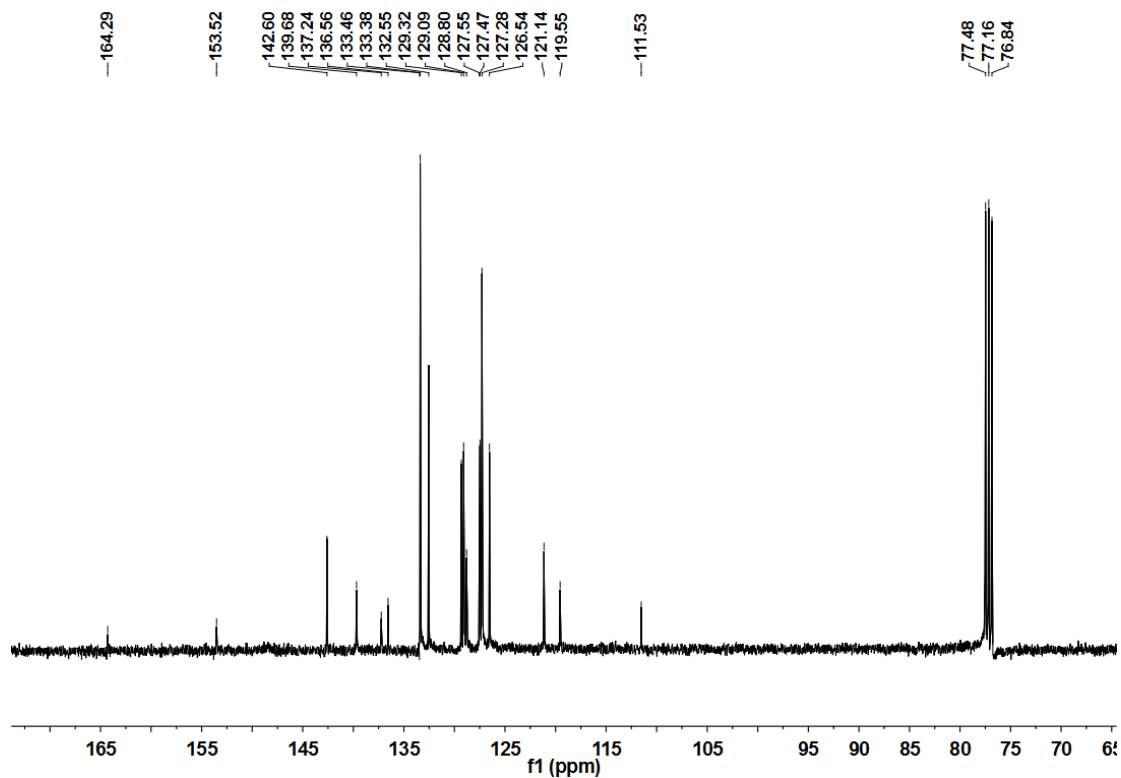

**Figure S7.** <sup>13</sup>C NMR spectrum of **3** in CDCl<sub>3</sub>.

## Z-matrix and total energy of 2

Symbolic Z-matrix:

Charge = 0 Multiplicity = 1

|   |         |         |         |
|---|---------|---------|---------|
| F | -2.3138 | 7.9531  | 12.5652 |
| F | -1.8578 | 8.9599  | 10.605  |
| N | -1.3178 | 6.6575  | 10.8028 |
| O | -0.1234 | 8.3977  | 12.0393 |
| B | -1.4161 | 8.0442  | 11.5319 |
| C | -2.4245 | 5.9018  | 10.6807 |
| H | -3.2038 | 6.1766  | 11.1071 |
| C | -2.4446 | 4.7502  | 9.9568  |
| H | -3.2144 | 4.2317  | 9.9047  |
| C | -1.2894 | 4.3737  | 9.3023  |
| H | -1.2789 | 3.6021  | 8.7835  |
| C | -0.1632 | 5.135   | 9.4177  |
| H | 0.6077  | 4.8845  | 8.9621  |
| C | -0.1495 | 6.2867  | 10.2102 |
| C | 1.0357  | 7.09    | 10.4593 |
| C | 1.0121  | 8.0611  | 11.4083 |
| C | 2.1662  | 8.8338  | 11.9312 |
| C | 1.9485  | 10.117  | 12.4039 |
| H | 1.0981  | 10.4884 | 12.3444 |
| C | 2.9716  | 10.8536 | 12.9603 |
| H | 2.809   | 11.7198 | 13.2596 |
| C | 4.2282  | 10.3173 | 13.0748 |
| H | 4.9147  | 10.8111 | 13.4606 |
| C | 4.4645  | 9.0483  | 12.6152 |
| H | 5.3176  | 8.6843  | 12.6827 |
| C | 3.4478  | 8.3042  | 12.0526 |
| H | 3.6207  | 7.4407  | 11.7513 |
| C | 2.2765  | 6.7553  | 9.7041  |
| C | 2.954   | 5.5692  | 9.9203  |
| H | 2.6135  | 4.9548  | 10.5302 |
| C | 4.1228  | 5.2794  | 9.2511  |
| H | 4.5653  | 4.4768  | 9.4103  |
| C | 4.6305  | 6.1802  | 8.3473  |
| H | 5.4234  | 5.9909  | 7.8983  |
| C | 3.9713  | 7.3582  | 8.1066  |
| H | 4.3167  | 7.9661  | 7.4938  |
| C | 2.7957  | 7.6436  | 8.7722  |
| H | 2.3473  | 8.4392  | 8.595   |

**Total Energy, E(TD-HF/TD-KS) = -1086.79494656**

Z-matrix and total energy of **3**.

Symbolic Z-matrix:

Charge = 0 Multiplicity = 1

|   |         |         |         |
|---|---------|---------|---------|
| O | -1.4399 | -1.05   | 10.9776 |
| N | -2.8716 | -1.8875 | 9.1675  |
| C | -2.2739 | -0.0237 | 11.1753 |
| C | -3.7873 | -0.9349 | 9.4967  |
| C | -3.4058 | 0.1209  | 10.4125 |
| C | -1.849  | 0.855   | 12.2979 |
| C | -0.7107 | -0.5347 | 8.5809  |
| C | -0.5628 | -3.0332 | 9.7079  |
| C | -2.7257 | 1.5538  | 13.1219 |
| H | -3.6406 | 1.5044  | 12.9631 |
| C | -4.3063 | 1.3161  | 10.5284 |
| C | -4.4802 | -3.098  | 7.8933  |
| H | -4.7012 | -3.8411 | 7.3803  |
| C | -0.4898 | 0.9241  | 12.5905 |
| H | 0.1168  | 0.4513  | 12.0683 |
| C | -3.2137 | -2.9324 | 8.3906  |
| H | -2.566  | -3.5673 | 8.1833  |
| C | -5.5645 | 1.2503  | 11.1066 |
| H | -5.8777 | 0.4355  | 11.4293 |
| C | -5.0696 | -1.0608 | 8.9509  |
| H | -5.7014 | -0.4003 | 9.1227  |
| C | -0.9021 | 2.3849  | 14.4326 |
| H | -0.5861 | 2.9028  | 15.1372 |
| C | 0.5353  | 0.0248  | 8.8551  |
| H | 1.0015  | -0.2666 | 9.6056  |
| C | -3.8668 | 2.5349  | 10.0556 |
| H | -3.0288 | 2.6012  | 9.6581  |
| C | -5.418  | -2.1265 | 8.1767  |
| H | -6.2816 | -2.1985 | 7.8409  |
| C | -0.7191 | -3.8604 | 10.8205 |
| H | -1.231  | -3.5588 | 11.5369 |
| C | -0.0324 | 1.6816  | 13.6454 |
| H | 0.8798  | 1.7149  | 13.8252 |
| C | -2.2603 | 2.3154  | 14.1663 |
| H | -2.86   | 2.7866  | 14.6977 |
| C | -1.3496 | -0.0668 | 7.4354  |
| H | -2.1784 | -0.4208 | 7.2045  |
| B | -1.3319 | -1.6279 | 9.603   |



|                                       |         |         |                       |
|---------------------------------------|---------|---------|-----------------------|
| C                                     | -0.7854 | 0.9125  | 6.6272                |
| H                                     | -1.2447 | 1.2123  | 5.8754                |
| C                                     | 1.1071  | 0.9972  | 8.0547                |
| H                                     | 1.9389  | 1.3504  | 8.2752                |
| C                                     | 0.4455  | 1.4427  | 6.9316                |
| H                                     | 0.8266  | 2.0928  | 6.3871                |
| C                                     | 0.2251  | -3.546  | 8.6845                |
| H                                     | 0.3623  | -3.0261 | 7.9261                |
| C                                     | -6.3581 | 2.3705  | 11.2129               |
| H                                     | -7.1966 | 2.3155  | 11.6117               |
| C                                     | 0.816   | -4.802  | 8.7449                |
| H                                     | 1.3381  | -5.1058 | 8.039                 |
| C                                     | 0.6278  | -5.5927 | 9.8496                |
| H                                     | 1.0119  | -6.4384 | 9.8929                |
| C                                     | -4.6583 | 3.6535  | 10.1685               |
| H                                     | -4.3435 | 4.4739  | 9.8641                |
| C                                     | -0.1387 | -5.1206 | 10.8966               |
| H                                     | -0.2654 | -5.6463 | 11.6524               |
| C                                     | -5.8996 | 3.5697  | 10.7221               |
| H                                     | -6.4386 | 4.326   | 10.7694               |
| <b>Total Energy, E(TD-HF/TD-KS) =</b> |         |         | <b>-1350.09452917</b> |
